# Supplementary figures and images for: Late Triassic Tectonic Setting in Northeastern Margin of North China Craton: Insight into Sedimentary and Apatite Fission Tracks
Source: MDPI journal article supplement (doi:10.3390/min13070975), 2023-07-22

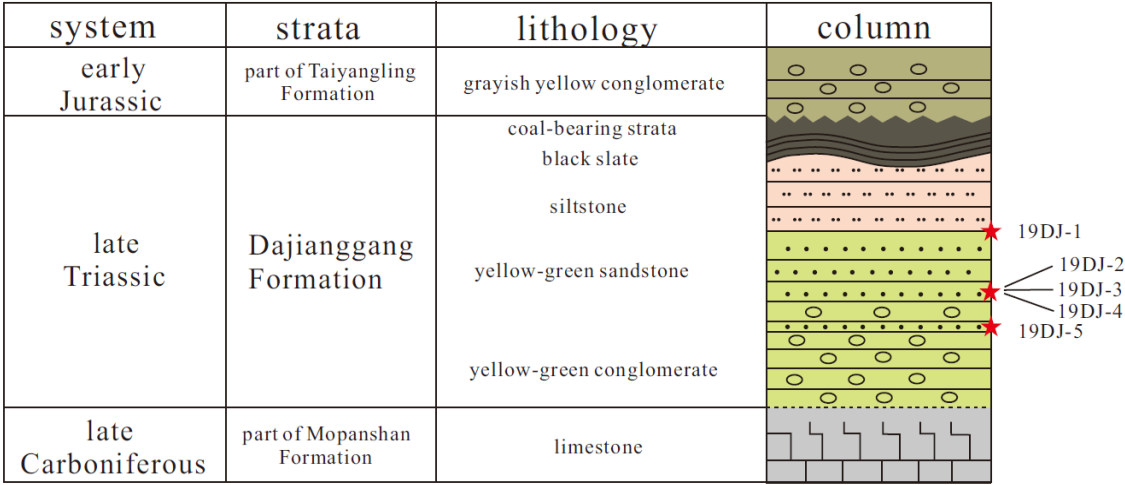

Figure S1: The strata column section of Dajianggang Formation in Dajianggang area.

Supplement: s1 [file s1]
